# Supplementary material
Source: publisher figshare collection journal article supplement (https://geolsoc.figshare.com/articles/dataset/_/3454478)
Supplement: Supplementary file 2 [file 1]

## Figures illustrating structural signatures of the Buteel and Zagan MCCs

### *Buteel MCC*

**Fig. 1S.** Diagram summarizing most of the features of the footwall orthogneisses in the southeast of the Buteel MCC.

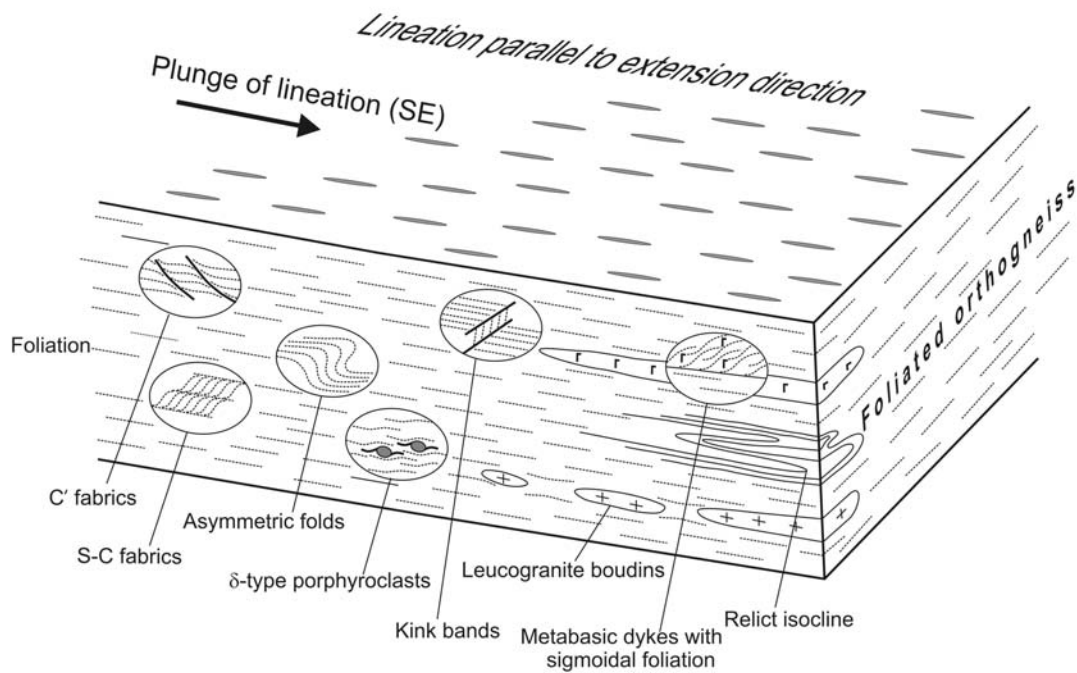

**Fig. 2S.** (a) Synoptic, lower hemisphere, equal angle projection stereograms of foliations ( $n = 100$ ) and lineations ( $n = 58$ ) of Mongolian part of the Buteel MCC; (b) foliations ( $n = 275$ ) of the Burgutoy complex (Russian part of the Buteel MCC, Transbaikalia); (c) lineations ( $n = 190$ ) of the Burgutoy complex.

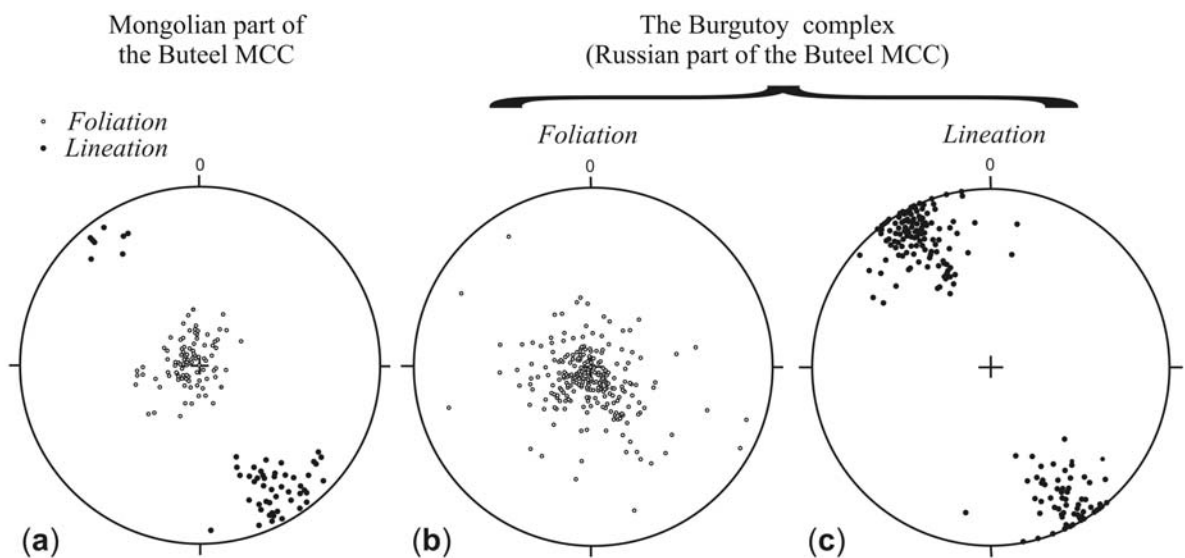

**Fig. 3S.** Photographs showing shear sense fabrics (**a-b**) and brittle structures (**c-d**) in the Buteel MCC: (**a**) asymmetric flow fold; (**b**) asymmetric pressure shadows around pebbles in mylonitized polymict conglomerates; (**c**) kink bands; (**d**) listric normal fault.

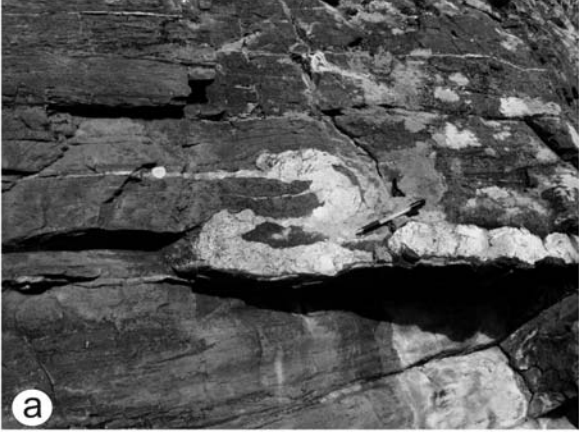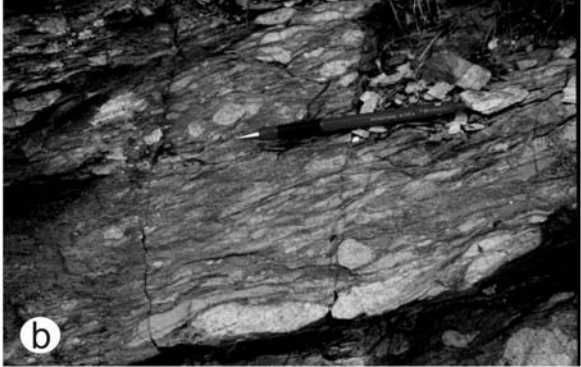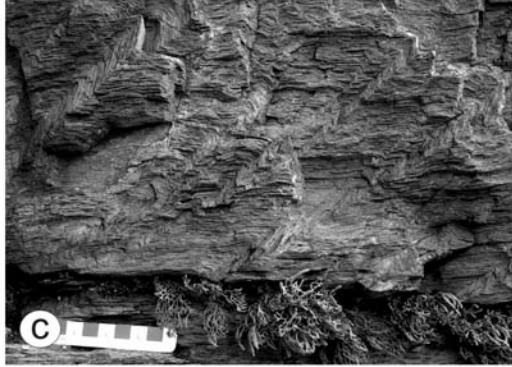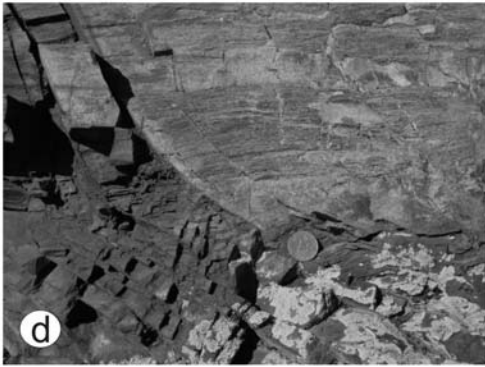

**Fig. 4S.** Structural features of synkinematic, amphibolite facies, basic dykes intruding gneisses in the footwall of the Buteel MCC

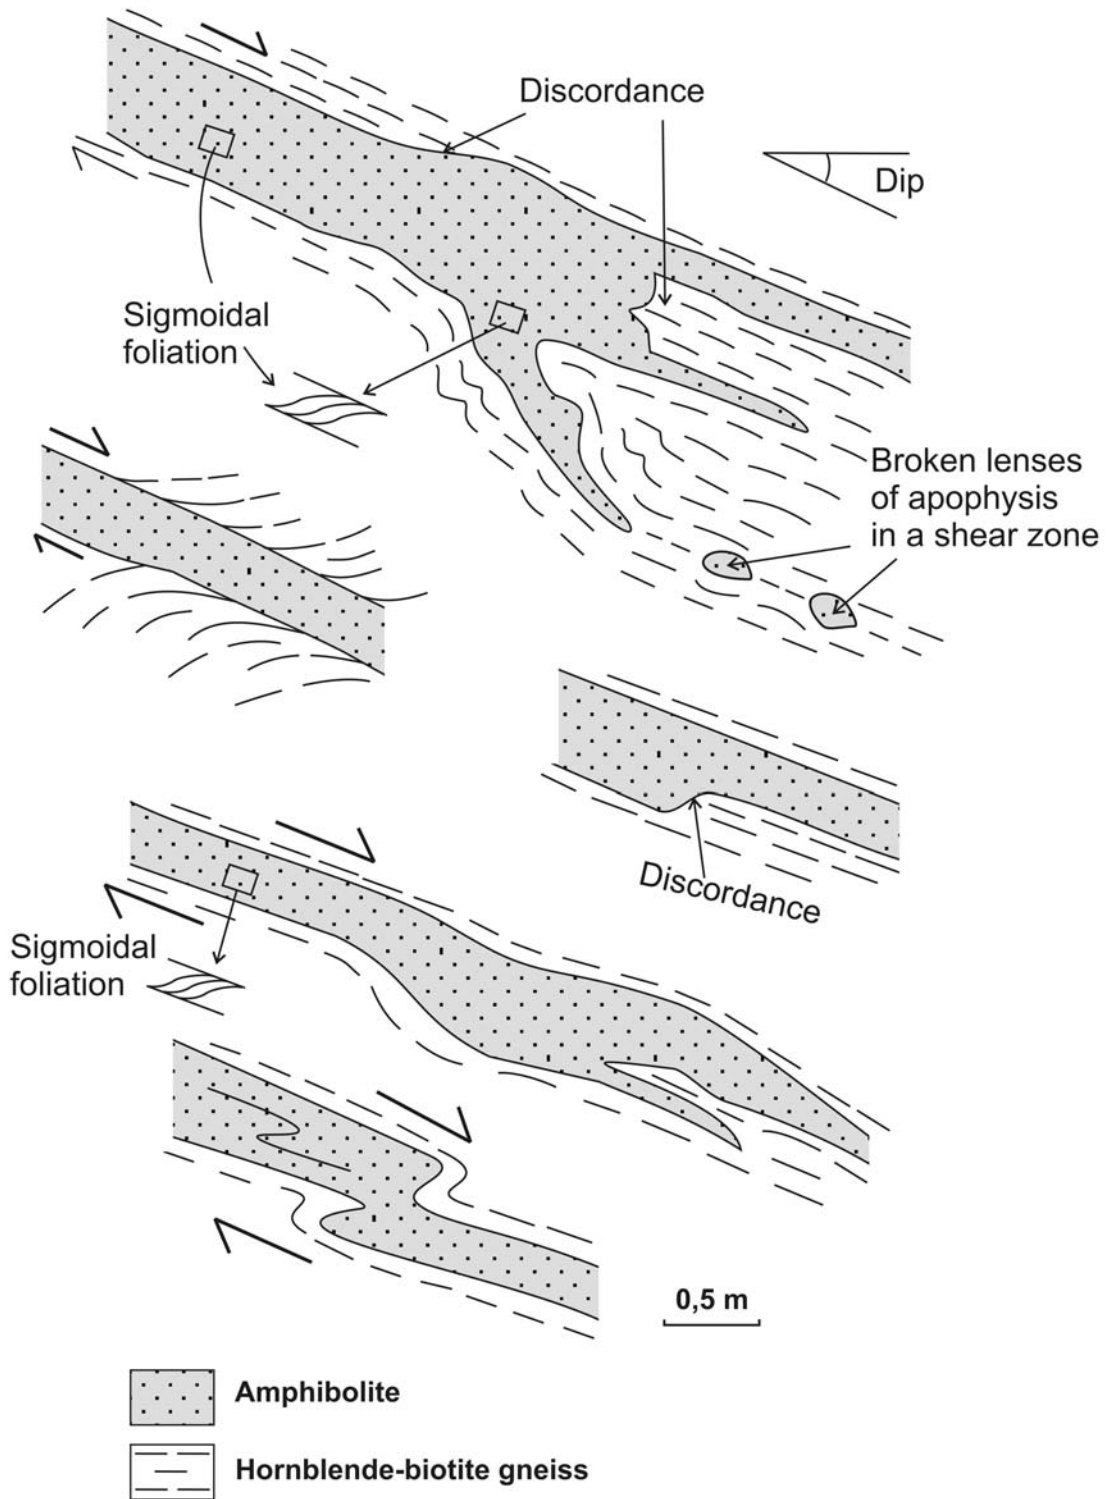

## Zagan MCC

**Fig. 5S.** Synoptic, lower hemisphere, equal angle projection stereograms of (a) foliations ( $n = 276$ ); (b) lineations ( $n = 190$ ); (c) fold hinges ( $n = 84$ ) of the Zagan MCC.

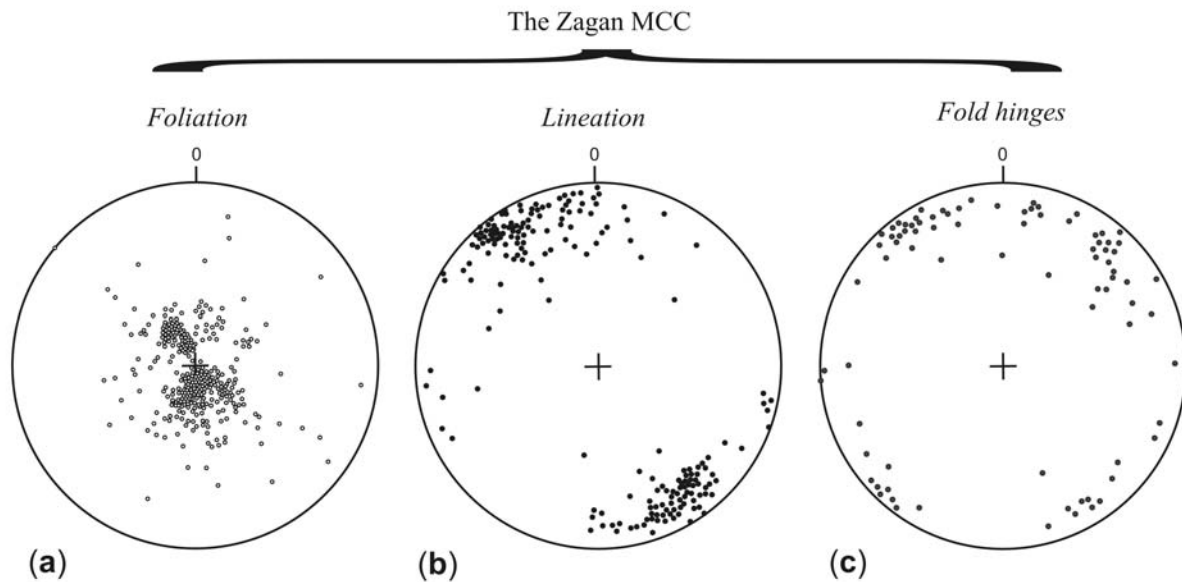

**Fig. 6S.** Photographs showing shear sense fabrics in mylonites of the Zagan MCC (modified after Sklyarov *et al.* (1997)): (a) stretched pebbles in mylonitized conglomerates (NW part of the Zagan complex); (b) quartz segregation fabrics (SE part of the Zagan complex).

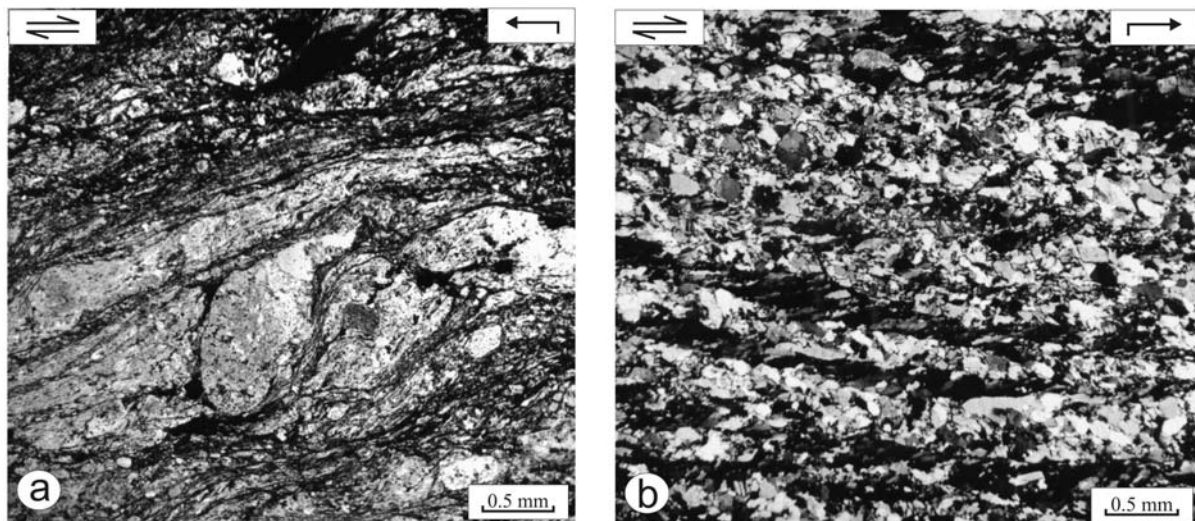

## Reference

Sklyarov, E.V., Mazukabzov, A.M. & Mel'nikov, A.I. 1997. *Metamorphic core complexes of the Cordilleran type*. SPC UIGGM Siberian branch of the RAS, Novosibirsk (in Russian).
